# Supplementary material for: Al–Pt compounds catalyzing the oxygen evolution reaction
Source: Royal Society of Chemistry journal article supplement (doi:10.1039/d2dt03234a), 2023-01-01
Supplement: d2dt03234a1.pdf [file d2dt03234a1.pdf]

## Supporting Information

### **Al-Pt compounds catalyzing the oxygen evolution reaction**

Ana María Barrios Jiménez, Olga Sichevych, Ioannis Spanos,  
Simone G. Altendorf, Alim Ormeci, Iryna Antonyshyn\*

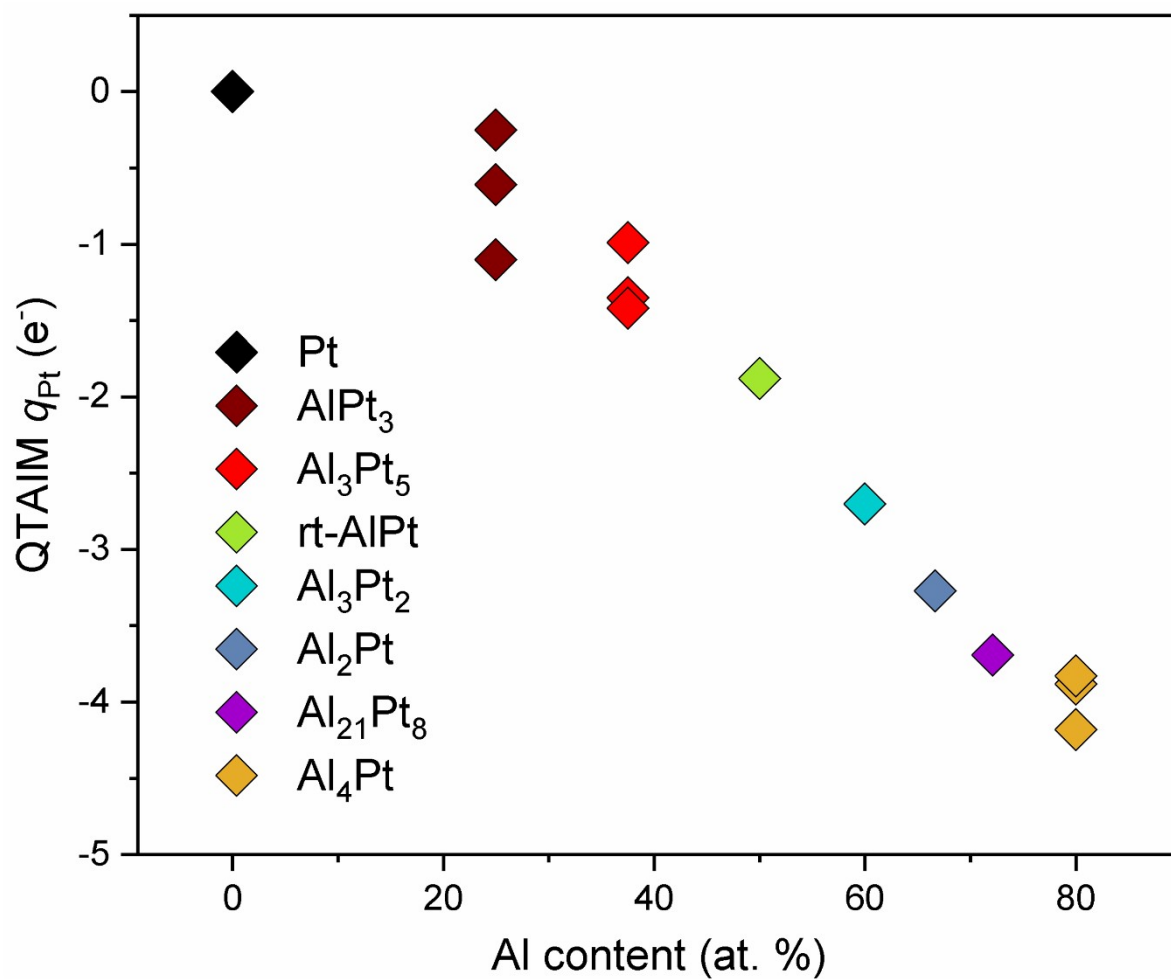

Figure S1. QAIM charges of Pt atoms as function of Al content in different Al-Pt compounds. The values are taken from [1], with exception of those for rt-AlPt (calculated in this work). The multiple points of same colour represent the different Pt atoms in the crystal structure.

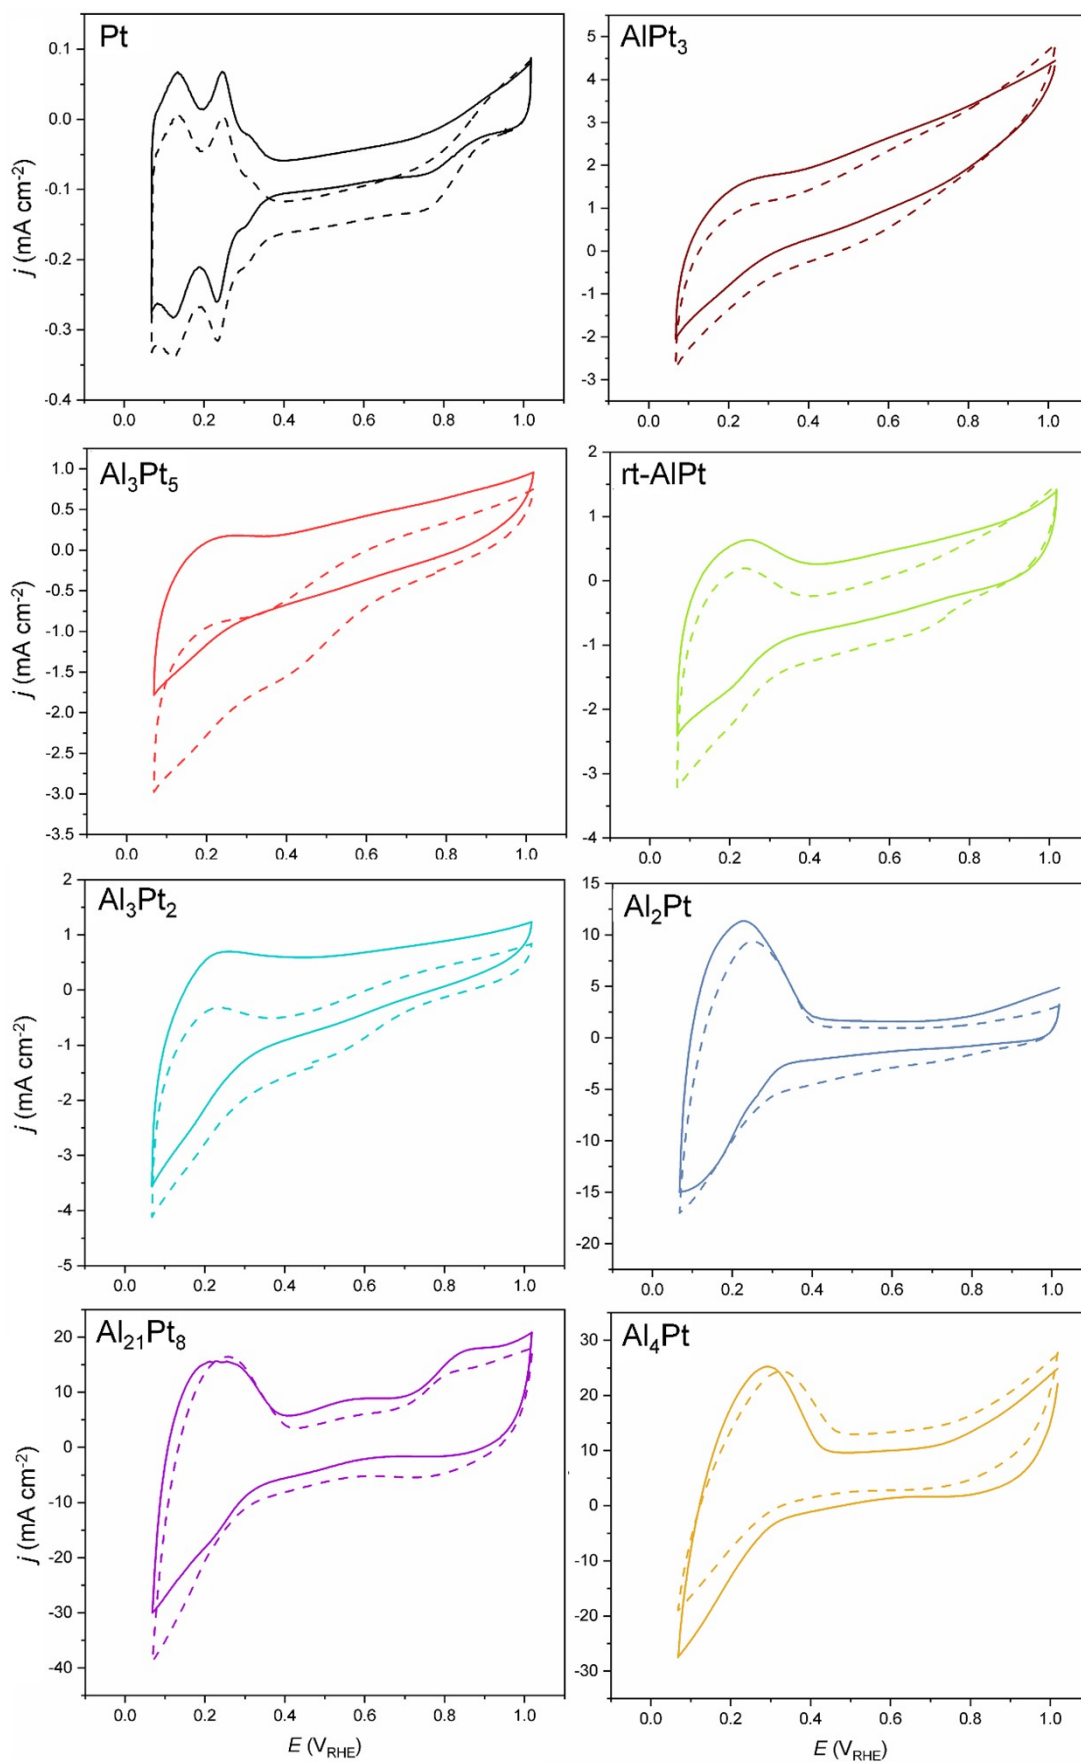

Figure S2. Cyclic voltammograms for the Al-Pt compounds and elemental Pt: 6<sup>th</sup> (dashed) and 50<sup>th</sup> (solid) cycles are shown.

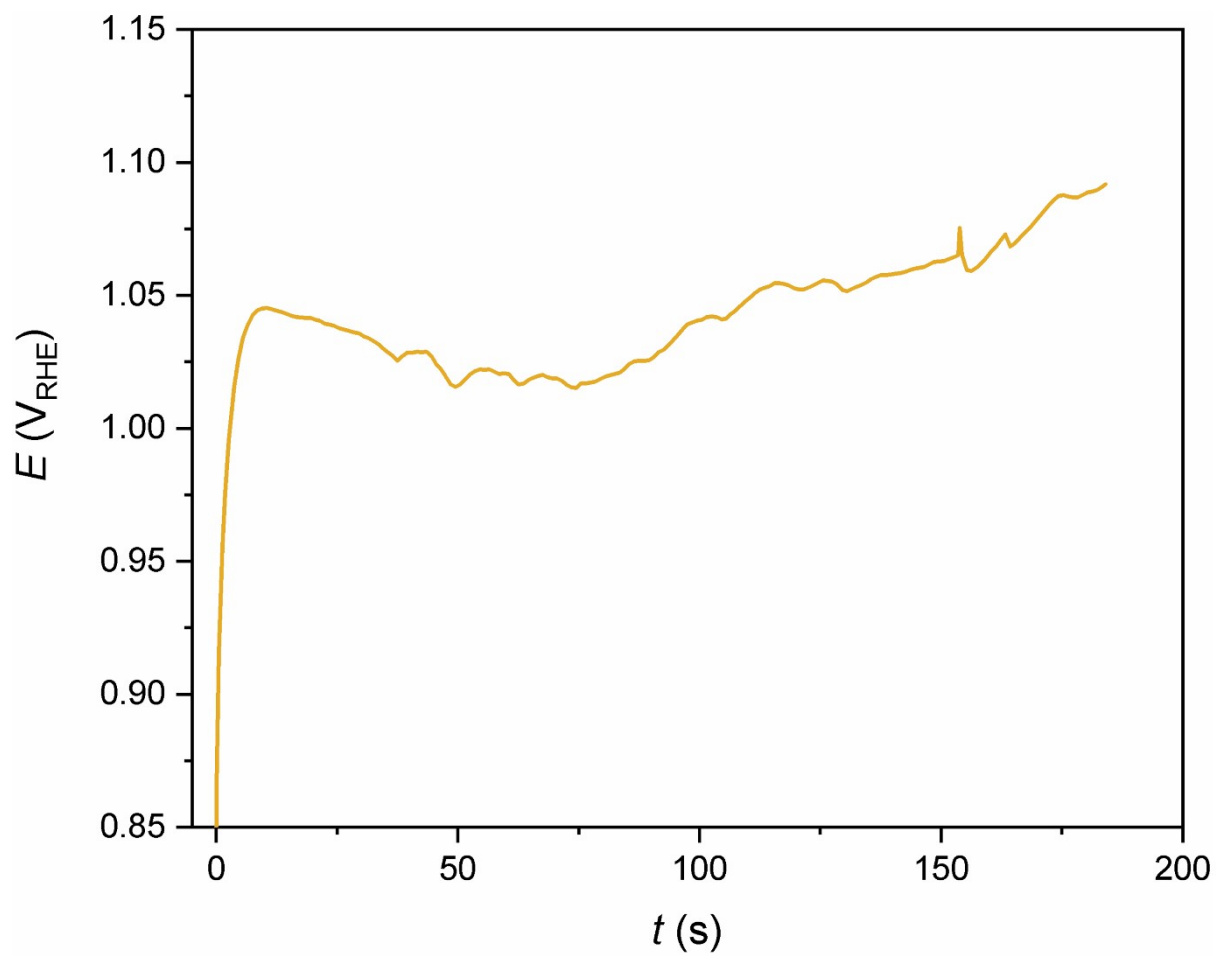

Figure S3. Chronopotentiometry for  $\text{Al}_4\text{Pt}$  at current density of  $10 \text{ mA cm}^{-2}$ .

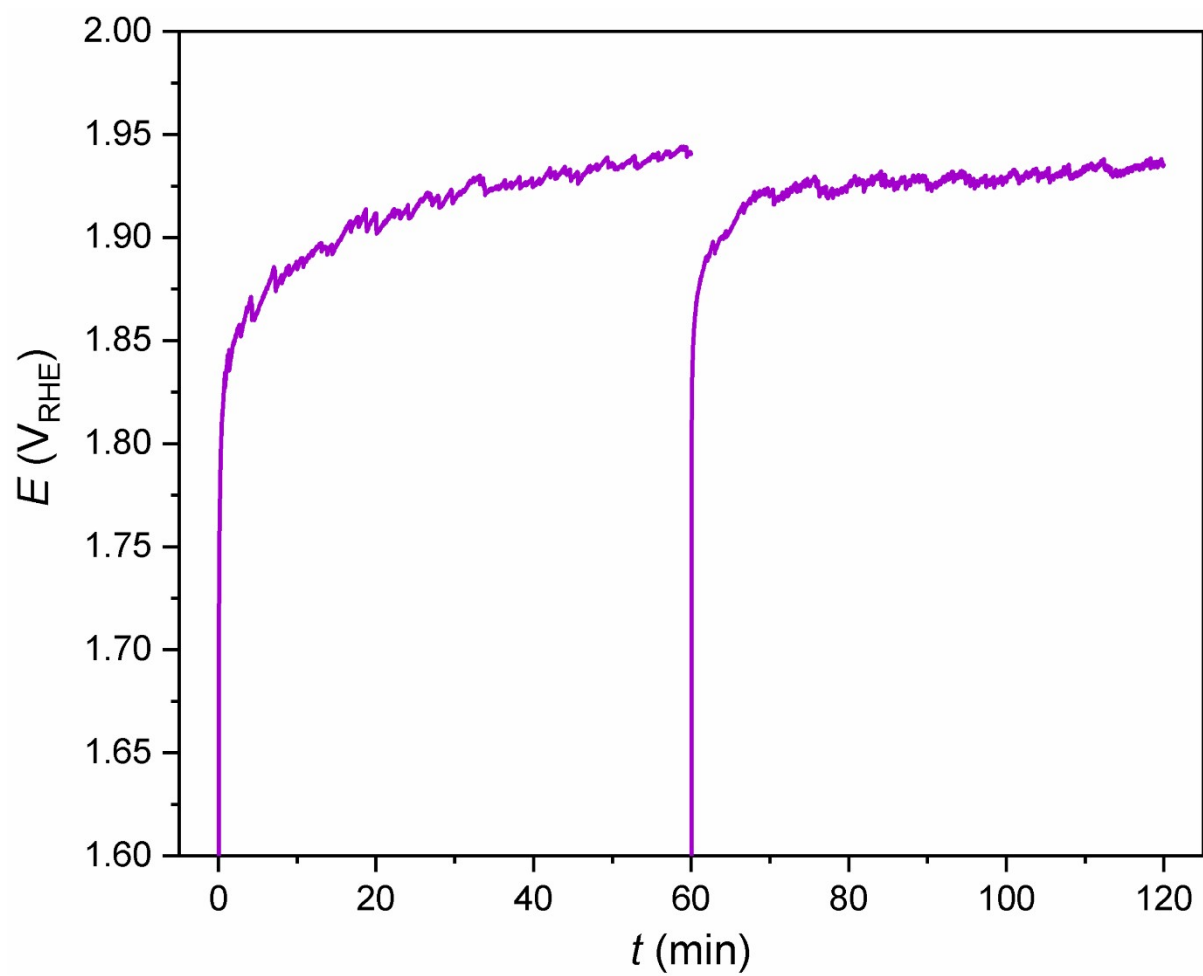

Figure S4. Chronopotentiometry for  $\text{Al}_{21}\text{Pt}_8$  at current density of  $10 \text{ mA cm}^{-2}$ .

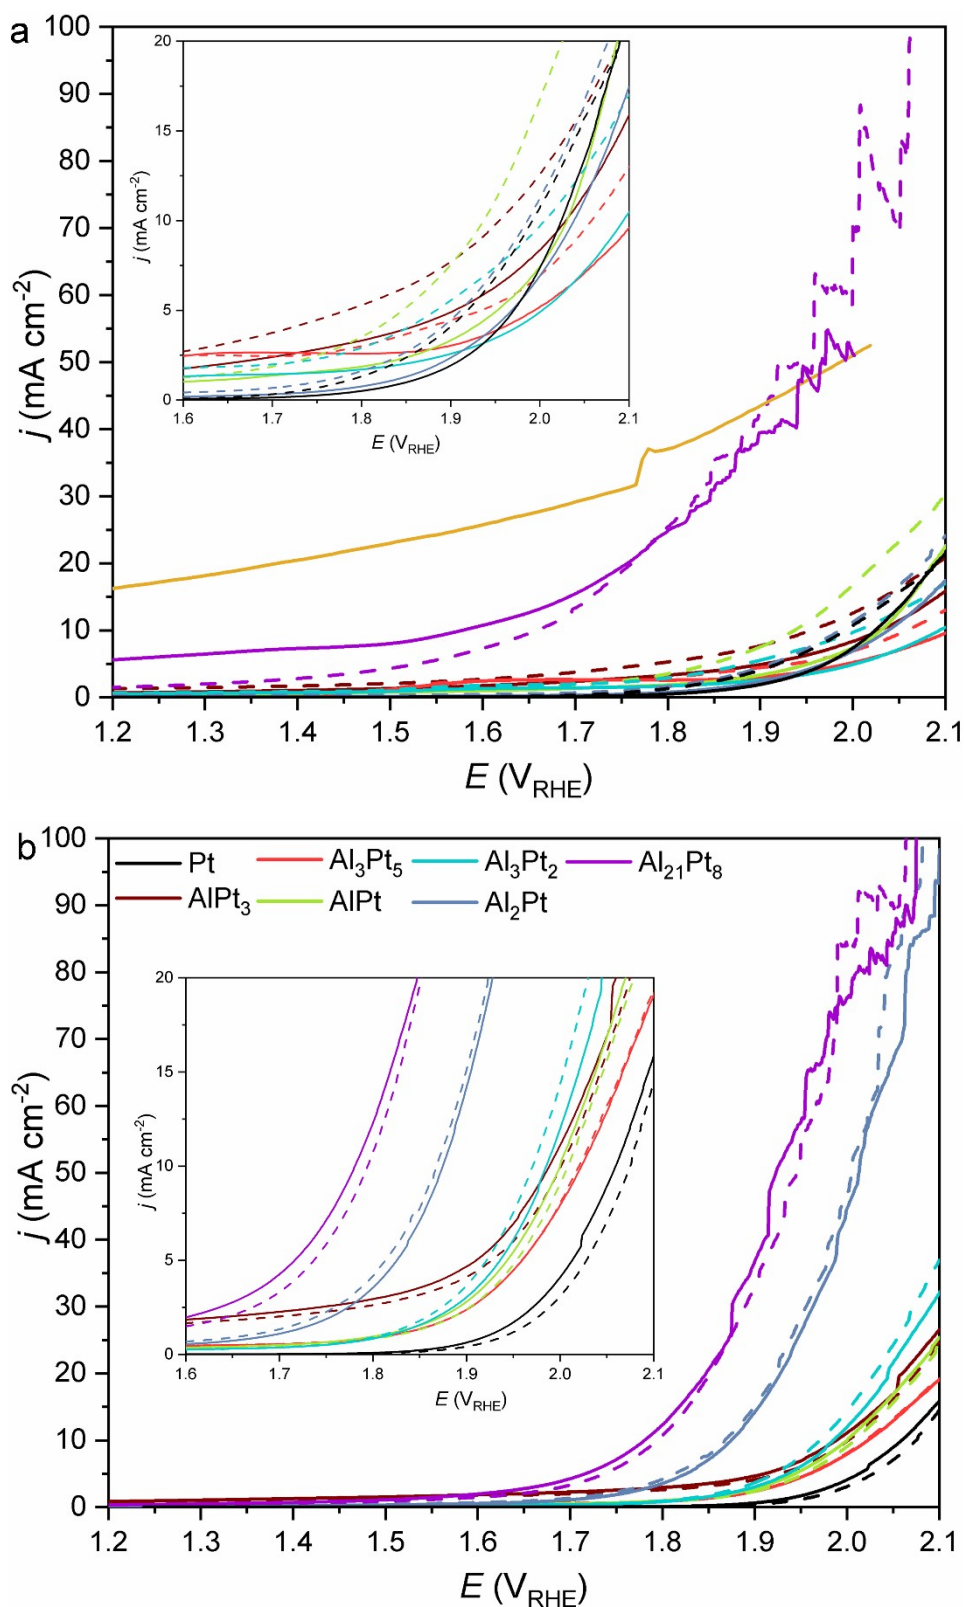

Figure S5. Linear sweep voltammograms with the Al-Pt compounds as anode materials: a) initial (*solid lines*) and after the cyclic voltammetry (*dashed lines*), and b) after one (*solid lines*) and two hours (*dashed lines*) of chronopotentiometry at the current density of 10 mA cm<sup>-2</sup>. Insets: enlargement of linear sweep voltammograms in the region from 0 to 20 mA cm<sup>-2</sup>. The *orange* curve (a) represents initial LSV with Al<sub>4</sub>Pt electrode.

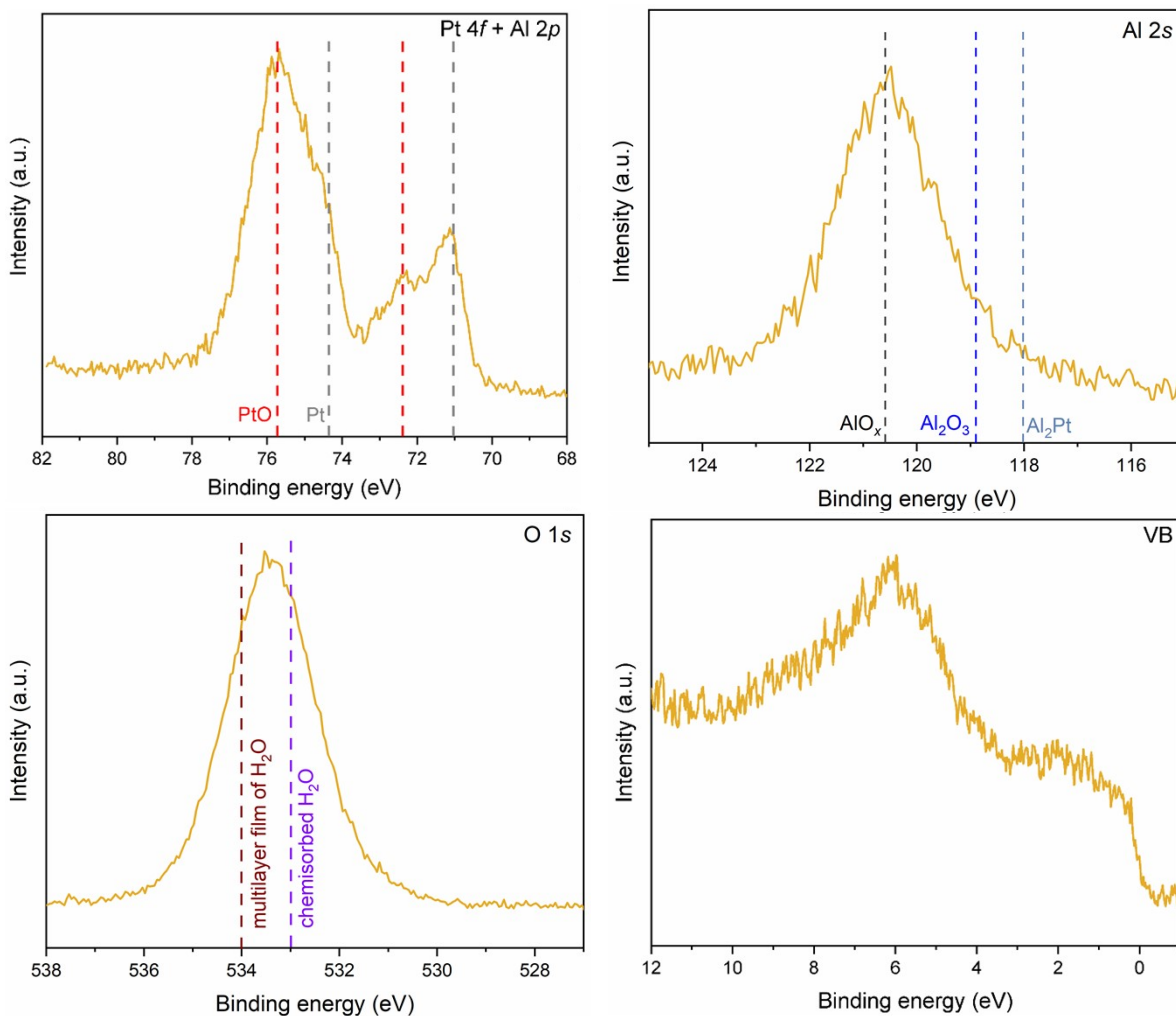

Figure S6. XPS spectra of the Pt 4*f*, Al 2*s*, O 1*s* core levels and valence band for the Al<sub>4</sub>Pt compound after 200 s of chronopotentiometry at current density of 10 mA cm<sup>-2</sup>.

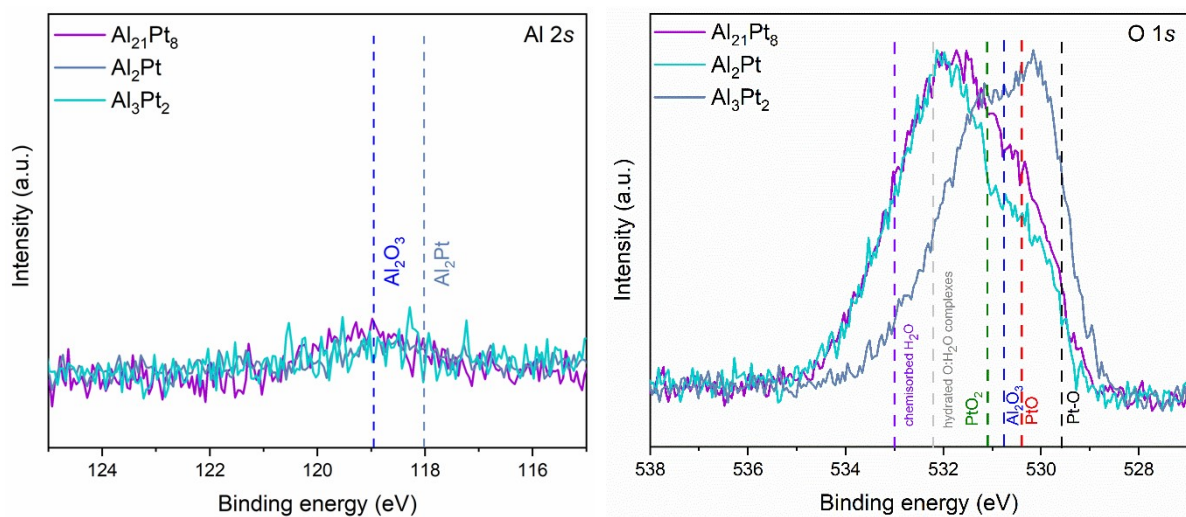

Figure S7. Normalized XPS spectra of the Al 2s and O 1s core levels for the selected Al-Pt compounds after 2 h of chronopotentiometry at current density of 10 mA cm<sup>-2</sup>.



Table S1. Experimental details on homogenization annealing of Al-Pt compounds.

| <b>Compound</b>                  | <b><math>T</math>, °C</b> | <b><math>t</math>, days</b> |
|----------------------------------|---------------------------|-----------------------------|
| rt-AlPt <sub>3</sub>             | 1000                      | 35                          |
| Al <sub>3</sub> Pt <sub>5</sub>  | 1000                      | 35                          |
| rt-AlPt                          | 1000                      | 21                          |
| Al <sub>3</sub> Pt <sub>2</sub>  | 1000                      | 21                          |
| Al <sub>2</sub> Pt               | 1000                      | 26                          |
| Al <sub>21</sub> Pt <sub>8</sub> | 600                       | 28                          |
|                                  | 1000                      | 14                          |
| Al <sub>4</sub> Pt               | 600                       | 28                          |
|                                  | 780                       | 14                          |

Table S2. SPS densification of the Al-Pt samples.

| <b>Compound</b>                  | <b>SPS conditions</b> |           |           |
|----------------------------------|-----------------------|-----------|-----------|
|                                  | $T_{\max}$ , °C       | $t$ , min | $P$ , MPa |
| Pt                               | 1200                  | 10        | 80        |
| rt-AlPt <sub>3</sub>             | 1000                  | 10        | 80        |
| Al <sub>3</sub> Pt <sub>5</sub>  | 1000                  | 3         | 80        |
| rt-AlPt                          | 1000                  | 3         | 80        |
| Al <sub>3</sub> Pt <sub>2</sub>  | 1000                  | 5         | 80        |
| Al <sub>2</sub> Pt               | 1000                  | 10        | 80        |
| Al <sub>21</sub> Pt <sub>8</sub> | 900                   | 10        | 80        |
| Al <sub>4</sub> Pt               | 700                   | -         | 80        |

Table S3. Lattice parameters of the Al-Pt intermetallic compounds.

| <b>Compound</b>                  | <b>Structure type</b>            | <b>Space group</b> | <b>Lattice parameters, Å</b> |                       |                       |
|----------------------------------|----------------------------------|--------------------|------------------------------|-----------------------|-----------------------|
|                                  |                                  |                    | <b><math>a</math></b>        | <b><math>b</math></b> | <b><math>c</math></b> |
| rt-AlPt <sub>3</sub>             | GaPt <sub>3</sub>                | $P4/mbm$           | 5.4655(3)                    | $a$                   | 7.8005(7)             |
| Al <sub>3</sub> Pt <sub>5</sub>  | Ge <sub>3</sub> Rh <sub>5</sub>  | $Pbam$             | 5.4143(6)                    | 10.732(1)             | 3.9636(5)             |
| rt-AlPt                          | FeSi                             | $P2_13$            | 4.8656(1)                    | $a$                   | $a$                   |
| Al <sub>3</sub> Pt <sub>2</sub>  | Ni <sub>2</sub> Al <sub>3</sub>  | $P\bar{3}m1$       | 4.2050(2)                    | $a$                   | 5.1721(2)             |
| Al <sub>2</sub> Pt               | <i>anti</i> -CaF <sub>2</sub>    | $Fm\bar{3}m$       | 5.9243(2)                    | $a$                   | $a$                   |
| Al <sub>21</sub> Pt <sub>8</sub> | Al <sub>21</sub> Pt <sub>8</sub> | $I4_1/a$           | 12.9531(2)                   | $a$                   | 10.6667(3)            |
| Al <sub>4</sub> Pt               | Al <sub>4</sub> Pt               | $P3c1$             | 13.0769(2)                   | $a$                   | 9.6367(3)             |

Table S4. The concentrations of Al in the electrolyte ( $C$ , mg L<sup>-1</sup>) after 2h CP experiments with various Al-Pt compounds

| <b>Compound</b>                  | <b><math>C(\text{Al})</math>, mg L<sup>-1</sup></b> |
|----------------------------------|-----------------------------------------------------|
| rt-AlPt <sub>3</sub>             | < 0.001                                             |
| Al <sub>3</sub> Pt <sub>5</sub>  | 0.9                                                 |
| rt-AlPt                          | 0.12                                                |
| Al <sub>3</sub> Pt <sub>2</sub>  | < 0.001                                             |
| Al <sub>2</sub> Pt               | 0.23                                                |
| Al <sub>21</sub> Pt <sub>8</sub> | 3.32                                                |
| Al <sub>4</sub> Pt               | 11.39                                               |

Table S5. Pt 4*f* core levels positions for the Al-Pt intermetallic compounds.\*

| <b>Compound</b>                  | <b>Binding energy, eV</b>    |                              |
|----------------------------------|------------------------------|------------------------------|
|                                  | Pt 4 <i>f</i> <sub>5/2</sub> | Pt 4 <i>f</i> <sub>7/2</sub> |
| Pt                               | 74.2                         | 70.9                         |
| rt-AlPt <sub>3</sub>             | 74.5                         | 71.2                         |
| Al <sub>3</sub> Pt <sub>5</sub>  | 75.3                         | 72.0                         |
| rt-AlPt                          | 75.2                         | 71.9                         |
| Al <sub>3</sub> Pt <sub>2</sub>  | 75.6                         | 72.3                         |
| Al <sub>2</sub> Pt               | 75.6                         | 72.3                         |
| Al <sub>21</sub> Pt <sub>8</sub> | 76.1                         | 72.8                         |
| Al <sub>4</sub> Pt               | 76.1                         | 72.8                         |

\*Taken from HAXPES data [2] and estimated at maximum peak intensity.

## References:

- [1] Baranov, A., Kohout, M., Wagner, F.R., Grin, Y., Bronger, W. // *Z. Kristallogr.* **2007**, 222, 527-531.
- [2] I. Antonyshyn, O. Sichevych, U. Burkhardt, A.M. Barrios Jiménez, D. Takegami, A. Melendez-Sans, Y.-F. Liao, K.-D. Tsuei, D. Kasinanthan and A. Ormeci, *submitted*.
